# Supplementary material for: Biological control on iron phyllosilicate authigenesis and Archean ocean chemistry
Source: Research Square preprint supplement (doi:10.21203/rs.3.rs-6098202/v1), 2025-04-01
Supplement: Supplementary file 1 [file 5ed96d71cd3700fdbe9d8dac.docx]

**Appendix-I: Detailed Geological Background of Kushtagi Hungund Schist Belt (KHSB)**

Our investigation was focused on chert and BHQ (Banded Hematite Quartzite) samples, collected from the cherty-BIF sections of the Kushtagi Hungund Schist Belt (KHSB) of the Central Dharwar Craton (CDC), South Indian Shield (SIS). The KHSB, also mentioned as Kushtagi Schist Belt in the previous literature, is the northern part of the Ramagiri-Hungund composite greenstone belt, or tectonostratigraphic superterrane (RHST), and belongs to the group of the late-Archean younger greenstone belts of the Dharwar Craton (DC), similar to the Sandur Schist Belt. It has been described as one of the least metamorphosed younger greenstone belts1,2. The volcano-sedimentary succession Taylor et al., 1984rests over the >2.9 Ga old 42,43 Peninsular Gneissic Complex (PGC) of TTG (Tonalite–trondhjemite–granodiorite) type crust 3. The major lithologies of this belt are metabasalt, metarhyolite and minor BIFs, which are intercalated with schistose metasediments and metavolcanics. The metabasalts are generally massive and pillowed; plagioclase and pyroxene are partly altered to chlorite and actinolite. Geochemical signatures of the metabasalts suggest a high-Mg tholeiitic nature, whereas the felsic volcanic rocks are comparable to adakites 4. Pb–Pb isochron ages obtained for the metabasalts from the Ramagiri region, southern part of the RHST, indicates that they are about 2750 Ma old 2. U–Pb zircon ages obtained from the pyroclastics in the central block yield about 2707 ± 18 Ma, has been considered as the time of emplacement of the felsic volcanics 5. Same crystallization ages are considered for the Hungund-Kushtagi rocks for Nd and Pb-isotopic calculations. The BIFs contain shaley and cherty varieties, possibly indicating shallower and deeper paleodepositional milieus, respectively 6. The geochemical signatures based on trace elements and oxygen isotopes have been studied by Khan et al. 2. The present study deals with specific mineral assemblages, not reported previously from Dharwar BIFs, found in the samples collected from the cherty BIF section of the Amingarh Mines (location S-2, Fig. 1c) area.

Reference

1. Khan, R. M. K. & Naqvi, S. M. Geology, geochemistry and genesis of BIF of Kushtagi schist belt, Archaean Dharwar Craton, India. *Miner Depos* 31, 123–133 (1996).

2. Khan, R. M. K., Das Sharma, S., Patil, D. J. & Naqvi, S. M. Trace, rare-earth element, and oxygen isotopic systematics for the genesis of banded iron-formations: Evidence from Kushtagi schist belt, Archaean Dharwar Craton, India. *Geochim Cosmochim Acta* 60, 3285–3294 (1996).

3. Taylor, P. N., Chadwick, B., Moorbath, S., Ramakrishnan, M. & Viswanatha, M. N. Petrography, chemistry and isotopic ages of Peninsular Gneiss, Dharwar acid volcanic rocks and the Chitradurga granite with special reference to the late Archean evolution of the Karnataka craton, southern India. *Precambrian Res* 23, 349–375 (1984).

4. Chadwick, B., Vasudev, V. N. & Ahmed, N. The Sandur Schist Belt and its Adjacent Plutonic Rocks Implications for Late Archaean Crustal Evolution in Karnataka. *Geological Society of India* 47, 37–57 (1996).

5. Balakrishnan, S., Rajamani, V. & Hanson, G. N. U‐Pb Ages for Zircon and Titanite from the Ramagiri Area, Southern India: Evidence for Accretionary Origin of the Eastern Dharwar Craton during the Late Archean. *J Geol* 107, 69–86 (1999).

6. Mohan, M. R., Piercey, S. J., Kamber, B. S. & Sarma, D. S. Subduction related tectonic evolution of the Neoarchean eastern Dharwar Craton, southern India: New geochemical and isotopic constraints. *Precambrian Res* 227, 204–226 (2013).

**Appendix-II: Hydrochemical modelling for co-precipitation of greenalite (Gre) and calcite (Cal)**

References for Archean seawater composition (predicted/modelled and estimated) and considered parameters for present study

| **Parameters of Archean Ocean Water-Atmosphere-Earth Surface** | **Values (Assumptions)** | **References and explanations:** |
| --- | --- | --- |
| Pre-GOE pO2 before the rise of Atmospheric O2 (before 2.4 Ga) | 1×10–6 atm  = 10–6×1 atm  = 10–6×1000000 ppm  = 1 ppm | (Lyons et al., 2014)  (Referred in) Supplemental material of Halevy et al., (Halevy et al., 2017a) |
| O2 during anoxic experiments of Gr-precipitation | < 0.1 ppm | (Hinz et al., 2021; Tosca et al., 2016) |
| Concentration of O2(aq) used in reaction modelling | 0.05 mg/kg = 0.05 ppm  (Representing anoxic hydrochemical environment) | This study |
| Upper limit of estimated dissolved sea-water Silica [SiO2aq] | 1.9 mM = 1900 *μM* (for Amph. Silica saturation)  840–1900 *μM =* 0.84–1.9 mM (Combining riverine flux of reactive iron to the ocean and deep-sea hydrothermal fluxes of iron and silica) | (Hinz et al., 2021)  (Halevy et al., 2017a) |
| Lower limit of estimated dissolved sea-water Silica [SiO2aq] | 400–1,000 *μM* = 0.4–1.0 mM  (sea-water lower limit of dissolved Silica, given relatively rapid diffusion of silica from seawater into porewater and relatively large hydrothermal fluxes of reactive iron in the Precambrian Ocean) | (Halevy et al., 2017a; Siever, 1992) |
| Concentration of dissolved SiO2(aq) used in reaction modelling | 1.9 mM  (Greenalite relicts have been found encased within silica matrix. Hence, saturation concentration for amorphous SiO2 has been used for modelling) | This study |
| Possible bracket for marine  dissolved Fe2+ concentrations before the evolution of oxygenic photosynthesis- Archean average | mFe2+ = 4 × 10−3 × mCa2+  = 4 × 10−3 × (Phanerozoic average mCa2+)  = 4 × 10−3 × (10–30 mM)  = *40* ‒ *120 μM* | (Canfield, 2005) and references therein. |
| Concentration of dissolved Fe2+ used in reaction modelling | 40 *μM*  (Using the lower limit of Fe2+ solubility) | This study |
| Archean analogue of Ca2+ concentration based on modern ocean values | 10 mM | (Nims & Johnson, 2022) and references therein. |
| Modelled higher values of Archean [Ca2+] concentrations, dissolved in Oceans. | 35 – 40 mM | (Nims & Johnson, 2022) and references therein. |
| 50 – 100 mM | (Halevy & Bachan, 2017)  (Referred in) (Nims & Johnson, 2022) |
| Molar ratio of Fe2+ and Ca2+ is equivalent to the ratio of the solubility product of siderite (Sid) and calcite (Cal) | mFe2+ / mCa2+  = KSid / KCal  = 10−10.8 / 10−8.4 = 4 × 10−3.  *Hence, mFe2+ = 4 × 10−3 × mCa2+* | (Canfield, 2005) and references therein. |
| Concentration of dissolved Ca2+ used in reaction modelling | 10 mM  (As considered C(Fe2+) = 40 *μM* for the modelling) | This study |
| Atmospheric CO2 level during pre-GOE Archean Era  (1 bar = 0.986923 atm)  (Catling & Zahnle, 2020) | 0.03–0.15 bar 2.77 Ga | Mt. Roe paleosol, Australia (43) |
| 0.02–0.75 bar 2.75 Ga | Bird paleosol, South Africa (43) |
| 0.003–0.015 bar 2.69 Ga | Alpine Lake paleosol, MN, United States (168) |
| 0.05–0.15 bar 2.46 Ga | Pronto/NAN paleosol, Canada (43) |
| <~0.8 bar 3.8–2.4 Ga | Enough UV to make S-MIF (58) |
| Atmospheric CO2 levels assumed in GR-precipitation experiments to represent pre-GOE Archean Era | 10–3, 10–2 and 10–1 atm  = 0.001, 0.01 and 0.1 atm | (Halevy et al., 2017) |
| pCO2 considered for reaction modelling | 10–2 atm = 0.01 atm  (Low-temp. reaction modelling at 25 **°C**) | This study |
| Archean Ocean water concentration of aqueous dissolved sodium chloride and potassium chloride (at approximate modern ocean concentrations, assuming relatively constant salinity over time) (Riley and Chester, 1971) | 400 mM for NaCl (aq) and 7 mM for KCl (aq). | (Hinz et al., 2021) and references therein. |
| Concentration of dissolved NaCl(aq) and KCl(aq) considered for reaction modelling | 400 mM and 7 mM, respectively | This study |
| Concentrations of Cl- taken to be identical to the present-day ocean value in GR-precipitation experiment and dynamic iron-cycle modelling | 546 mM | (Halevy et al., 2017a) |
| Cl/K in Oceans between 3.5–3.0 Ga | Cl/K ~50  Cl/K ratio of the most diluted sample (~54) is indistinguishable from the ratio in modern seawater. | (Albarede et al., 2020; Catling & Zahnle, 2020) |
| Concentration of dissolved Cl- considered for reaction modelling | 450 mM for a plausible lower limit (keeping account for considered NaCl, KCl, MgCl2 and NH4Cl concentrations) | This study |
| Cl/K considered to minimize charge imbalance in the theoretical modelling  (Acquired through iterations) | 64  (Considering 450 mM for a plausible limit for Cl- concentration and 7 mM for K+ concentration, Cl/K ≈ 64.23) | This study |
| Concentrations of Mg2+, as in the form of MgCl2(aq), considered for Archean sea-water during the study of bacterial influence and inorganic controls on potential Archean precipitates | 10 mM  (Lower than present, keeping in mind that lower surface runoff, the main source of Mg, prevailed in pre-oxygenic Archean Era compared to post-GOE, Phanerozoic and present times) | (Albarede et al., 2020; Nims & Johnson, 2022) |
| Concentration of dissolved Mg2+ used in reaction modelling | 10 mM | This study |
| Concentrations of Br- taken to be identical to the present-day ocean value in GR-precipitation experiment and dynamic iron-cycle modelling | 0.84 mM | (Halevy et al., 2017) |
| Concentration of dissolved Br- used in reaction modelling | 0.84 mM | This study |
| Modelled P utilization with Fe2+ in phototrophic carbon fixation during pre-oxygenic (anoxygenic) photosynthesis (Archean Oceans) (8-25/ 7-22 times lower than modern deep-water average) | 1 mole P ≡ 424 Fe2+  0.094 to 0.28 μM P ≡ 40 to 120 μM Fe2+ (Archean average Ocean concentration of Fe2+)  Hence, Archean pre-Oxygenic P availability in oceans, -  *0.094*–*0.28 μM* of P  Hence, a concentration of 0.2 *μM* has been considered as a mean plausible estimate.  Equivalent H3PO4(aq) would be 0.8*μM*. As, 1 mole P (or P4) produces 4 moles of H3PO4.  [(1) P4 + 5O2 = P4O10  (2) P 4 O 10 + 6 H 2 O = 4H3PO4] | (Canfield, 2005) |
| Pre-GOE SO42-(aq) in bulk Archean Ocean water before the rise of Atmospheric O2 (before 2.4 Ga) | 50 *μM* | (Leavitt et al., 2013)  (NJ Planavsky, 2012)  ((Halevy et al., 2017) |
| Post-GOE SO42-(aq) in bulk Proterozoic Ocean water after the rise of Atmospheric O2 (from 2.4 to 1.5 Ga) | 1 mM | Jamieson, J.W., Wing, B.A., Farquhar, J. and Hannington,  (Halevy et al., 2017) |
| Concentration of dissolved SO2(aq)used in reaction modelling | 50 *μM*  (As an estimate for pre-GOE seawater conditions) | This study |
| Concentrations of NH4Cl(aq) considered for Archean sea-water during the study of bacterial influence and inorganic controls on potential Archean precipitates | 1 mM | (Nims & Johnson, 2022) |
| NH4+(aq) at around 3.8 Ga | 0.03–10.3 mM  (probably porewater rather than seawater) | (Catling & Zahnle, 2020) and reference therein. |
| Concentration of dissolved NH4+(aq)used in reaction modelling | 0.03 mM | This study |
| Bicarbonate as an inorganic buffer based on the estimated range of inorganic carbon for the Archean Ocean constrained by calcium isotopic data | 5 – 30 mM | (Hinz et al., 2021) and reference therein. |
| Concentration of dissolved HCO3- used in reaction modelling | 5 mM | This study |

Two scenarios have been modelled at 25℃ and 1atm pressure with pCO2=0.01atm and C[Fe2+] =40 *μM*. Set-1 (Fig. 5A) models an open system (when Fhy is settling down through the open ocean) where effective activity of aqueous Fe2+ is independent of Fhy present Fe2+-generation, and set-2 (Fig. 5B) describes a closed to semi-closed system (within sediment pores infested by benthic microbes during authigenesis) the entire activity of aqueous Fe2+ of pore-water is in equilibrium with the Fhy present in the system for reduction.

Archean Seawater_Lower limits_25C_1atm_NH4=1mM: (SpecE8 configuration for speciation calculation):

Temperature = 25.0 C Pressure = 1.013 bar

pH = 7.196 log fO2 = -70.609

Eh = -0.2407 volts pe = -4.0692

Ionic strength = 0.459460 molal

Charge imbalance = -0.015715 eq/kg (-1.83% error)

Activity of water = 0.985431

Solvent mass = 1.0000 kg

Solution mass = 1.0268 kg

Mineral mass = 0.0000 kg

Fluid density = 1.014 g/cm3

compressibility = 4.354e-05 /bar

expansivity = 0.0002349 /C

viscosity = 0.009 poise

Chlorinity = 0.459356 molal

Dissolved solids = 26134 mg/kg sol'n

Elect. conductivity = 40706.03 uS/cm (or umho/cm)

Hardness = 1949.47 mg/kg sol'n as CaCO3

carbonate = 222.84 mg/kg sol'n as CaCO3

non-carbonate = 1726.63 mg/kg sol'n as CaCO3

Carbonate alkalinity= 222.84 mg/kg sol'n as CaCO3

Water type = Na-Cl

Bulk volume = 1.01e+03 cm3

Fluid volume = 1.01e+03 cm3

Mineral volume = 0.00 cm3

Inert volume = 0.00 cm3

Porosity = 100. %

Permeability = 98.7 cm2

No minerals in system.

Aqueous species molality mg/kg sol'n act. coef. log act.

------------------------------------------------------------------------------------------

Cl- 0.4453 1.538e+04 0.6473 -0.5402

Na+ 0.3863 8649. 0.6848 -0.5775

NaCl(aq) 0.01274 725.3 1.0000 -1.8947

Ca++ 0.009624 375.6 0.2664 -2.5911

Mg++ 0.008964 212.2 0.3316 -2.5269

K+ 0.006958 265.0 0.6473 -2.3464

HCO3- 0.003502 208.1 0.6848 -2.6201

SiO2(aq) 0.001858 108.7 1.0000 -2.7311

MgCl+ 0.0009171 53.37 0.6848 -3.2020

NH4+ 0.0009080 15.95 0.6255 -3.2457

NaHCO3(aq) 0.0009046 74.01 1.0000 -3.0435

CO2(aq) 0.0003425 14.68 1.0000 -3.4654

CaCl+ 0.0002175 16.00 0.6848 -3.8269

MgHCO3+ 0.0001130 9.390 0.6848 -4.1113

CaHCO3+ 9.998e-05 9.844 0.6848 -4.1645

CaCl2(aq) 4.841e-05 5.232 1.0000 -4.3151

N2(aq) 4.345e-05 1.185 1.0000 -4.3620

KCl(aq) 4.157e-05 3.018 1.0000 -4.3812

NaHSiO3(aq) 3.779e-05 3.683 1.0000 -4.4226

HS- 3.127e-05 1.007 0.6670 -4.6808

Fe++ 2.509e-05 1.364 0.2664 -5.1750

H2S(aq) 1.290e-05 0.4282 1.0000 -4.8894

FeHCO3+ 1.228e-05 1.398 0.6848 -5.0751

CaCO3(aq) 9.625e-06 0.9382 1.0000 -5.0166

CO3-- 8.333e-06 0.4870 0.2121 -5.7526

NH3(aq) 5.124e-06 0.08498 1.0000 -5.2904

MgCO3(aq) 5.005e-06 0.4109 1.0000 -5.3006

HSiO3- 4.686e-06 0.3518 0.6848 -5.4936

SO4-- 3.401e-06 0.3181 0.1931 -6.1827

NaCO3- 2.232e-06 0.1804 0.6848 -5.8157

FeCl+ 1.944e-06 0.1729 0.6848 -5.8757

NaSO4- 1.676e-06 0.1943 0.6848 -5.9401

FeCO3(aq) 6.344e-07 0.07158 1.0000 -6.1976

MgSO4(aq) 5.037e-07 0.05904 1.0000 -6.2978

OH- 2.348e-07 0.003889 0.6670 -6.8052

CaSO4(aq) 2.175e-07 0.02883 1.0000 -6.6626

Methane(aq) 1.125e-07 0.001757 1.0000 -6.9490

H+ 7.947e-08 7.800e-05 0.8008 -7.1963

FeOH+ 4.779e-08 0.003391 0.6848 -7.4851

KSO4- 3.273e-08 0.004309 0.6848 -7.6494

CaOH+ 8.190e-09 0.0004553 0.6848 -8.2511

NaOH(aq) 6.571e-09 0.0002560 1.0000 -8.1824

HCl(aq) 3.922e-09 0.0001393 1.0000 -8.4065

Formate 3.192e-09 0.0001400 0.6670 -8.6718

FeCl4-- 3.009e-09 0.0005791 0.1931 -9.2359

FeCl2(aq) 1.952e-09 0.0002410 1.0000 -8.7095

FeSO4(aq) 6.956e-10 0.0001029 1.0000 -9.1576

Na(For)(aq) 6.319e-10 4.185e-05 1.0000 -9.1994

H2(aq) 4.373e-10 8.585e-07 1.0000 -9.3592

H6(H2SiO4)4-- 3.102e-10 0.0001155 0.1931 -10.2226

Mg(For)+ 2.488e-10 1.680e-05 0.6848 -9.7686

KOH(aq) 2.418e-10 1.321e-05 1.0000 -9.6165

Ca(For)+ 2.146e-10 1.779e-05 0.6848 -9.8327

S-- 1.650e-10 5.151e-06 0.2307 -10.4196

H2SiO4-- 2.529e-11 2.318e-06 0.1931 -11.3112

K(For)(aq) 1.028e-11 8.420e-07 1.0000 -10.9881

HSO4- 5.815e-12 5.497e-07 0.6848 -11.3999

Fe(OH)2(aq) 4.026e-12 3.523e-07 1.0000 -11.3951

Fe(For)+ 1.397e-12 1.372e-07 0.6848 -12.0194

Acetate 9.623e-13 5.533e-08 0.7011 -12.1709

Formic_acid(aq) 7.672e-13 3.439e-08 1.0000 -12.1151

S2-- 7.457e-13 4.657e-08 0.1931 -12.8417

S2O3-- 2.744e-13 2.996e-08 0.1931 -13.2759

Fe(OH)3(aq) 2.064e-13 2.148e-08 1.0000 -12.6853

NaCH3COO(aq) 1.407e-13 1.124e-08 1.0000 -12.8518

MgCH3COO+ 5.568e-14 4.520e-09 0.6848 -13.4187

Fe(OH)2+ 4.161e-14 3.641e-09 0.6848 -13.5452

CaCH3COO+ 2.154e-14 2.080e-09 0.6848 -13.8311

Urea(aq) 1.767e-14 1.034e-09 1.0000 -13.7527

Fe(OH)3- 3.624e-15 3.772e-10 0.6848 -14.6052

Acetic_acid(aq) 2.454e-15 1.435e-10 1.0000 -14.6100

S3-- 2.356e-15 2.208e-10 0.1931 -15.3420

CO(aq) 1.752e-15 4.779e-11 1.0000 -14.7565

KCH3COO(aq) 1.655e-15 1.582e-10 1.0000 -14.7812

KHSO4(aq) 1.225e-15 1.625e-10 1.0000 -14.9118

Fe(OH)4- 1.172e-15 1.414e-10 0.6848 -15.0954

Acetamide(aq) 6.319e-16 3.635e-11 1.0000 -15.1994

NH4CH3COO(aq) 6.251e-16 4.693e-11 1.0000 -15.2040

H4(H2SiO4)4---- 6.073e-16 2.250e-10 0.0012 -18.1300

Oxalate 5.881e-16 5.041e-11 0.1931 -15.9448

SO3-- 4.170e-16 3.252e-11 0.2121 -16.0533

HSO3- 1.319e-16 1.041e-11 0.6848 -16.0442

FeCH3COO+ 1.284e-16 1.437e-11 0.6848 -16.0558

FeOH++ 2.620e-17 1.859e-12 0.2121 -17.2552

SCN- 2.596e-17 1.469e-12 0.6670 -16.7615

Ethane(aq) 1.360e-17 3.984e-13 1.0000 -16.8663

S4-- 4.488e-18 5.606e-13 0.1931 -18.0622

Methanol(aq) 3.418e-18 1.067e-13 1.0000 -17.4662

NH4SO4- 2.723e-18 3.026e-13 0.6848 -17.7293

Mg(For)2(aq) 2.690e-18 2.995e-13 1.0000 -17.5702

Ca(For)2(aq) 2.321e-18 2.940e-13 1.0000 -17.6344

Na(For)2- 1.031e-18 1.135e-13 0.6848 -18.1513

FeCO3+ 7.528e-19 8.494e-14 0.6848 -18.2877

Mg4(OH)4++++ 2.373e-19 3.818e-14 0.0034 -21.0978

H-Oxalate 1.905e-19 1.652e-14 0.6848 -18.8845

HS2O3- 5.083e-20 5.601e-15 0.6848 -19.4583

Fe(For)2(aq) 3.152e-20 4.478e-15 1.0000 -19.5015

K(For)2- 1.602e-20 2.015e-15 0.6848 -19.9597

Propanoate 1.482e-20 1.055e-15 0.6848 -19.9935

Malonate 9.750e-21 9.690e-16 0.1931 -20.7252

S5-- 5.152e-21 8.044e-16 0.1931 -21.0023

Methanamine(aq) 4.038e-21 1.221e-16 1.0000 -20.3938

Na(Prop)(aq) 2.962e-21 2.771e-16 1.0000 -20.5284

FeCl2+ 9.097e-22 1.123e-16 0.6848 -21.2055

H2SO3(aq) 5.852e-22 4.678e-17 1.0000 -21.2327

Fe+++ 5.807e-22 3.158e-17 0.0957 -22.2551

SO2(aq) 4.227e-22 2.637e-17 1.0000 -21.3739

H2SO4(aq) 2.534e-22 2.421e-17 1.0000 -21.5962

Mg(Prop)+ 2.273e-22 2.155e-17 0.6848 -21.8079

Fe(OH)4-- 1.991e-22 2.401e-17 0.1931 -22.4153

Ca(Prop)+ 1.790e-22 1.972e-17 0.6848 -21.9117

H-Malonate 8.678e-23 8.709e-18 0.6848 -22.2260

Propanoic_acid(aq) 5.005e-23 3.611e-18 1.0000 -22.3006

K(Prop)(aq) 4.818e-23 5.264e-18 1.0000 -22.3171

Glycine(aq) 1.489e-23 1.088e-18 1.0000 -22.8271

Formaldehyde(aq) 1.314e-23 3.842e-19 1.0000 -22.8814

FeCl++ 1.168e-23 1.038e-18 0.2121 -23.6061

Glycolate 6.380e-24 4.663e-19 0.6848 -23.3596

Ethanol(aq) 5.518e-24 2.476e-19 1.0000 -23.2582

Methionine(aq) 4.031e-24 5.857e-19 1.0000 -23.3946

Fe(Prop)+ 3.946e-24 4.954e-19 0.6848 -23.5683

Na(Glyc)(aq) 1.296e-24 1.238e-19 1.0000 -23.8873

Ca(Glyc)+ 7.307e-25 8.193e-20 0.6848 -24.3007

Acetaldehyde(aq) 5.870e-25 2.518e-20 1.0000 -24.2314

Mg(Gly)+ 4.772e-25 4.572e-20 0.6848 -24.4857

Mg(Glyc)+ 4.052e-25 3.920e-20 0.6848 -24.5568

Ca(CH3COO)2(aq) 1.585e-25 2.442e-20 1.0000 -24.7999

Oxalic_acid(aq) 1.547e-25 1.357e-20 1.0000 -24.8105

Mg(CH3COO)2(aq) 1.488e-25 2.064e-20 1.0000 -24.8274

Propane(aq) 9.859e-26 4.234e-21 1.0000 -25.0062

FeCl4- 9.088e-26 1.749e-20 0.6848 -25.2060

HCN(aq) 7.000e-26 1.842e-21 1.0000 -25.1549

Na(CH3COO)2- 5.762e-26 7.916e-21 0.6848 -25.4039

K(Glyc)(aq) 2.109e-26 2.344e-21 1.0000 -25.6760

Fe(Gly)+ 7.902e-27 9.996e-22 0.6848 -26.2667

Fe(Glyc)+ 6.410e-27 8.170e-22 0.6848 -26.3576

Succinate 5.166e-27 5.840e-22 0.1931 -27.0011

FeSO4+ 4.511e-27 6.674e-22 0.6848 -26.5101

Ca(Gly)+ 3.269e-27 3.634e-22 0.6848 -26.6500

Malonic_acid(aq) 2.685e-27 2.721e-22 1.0000 -26.5710

Glycolic_acid(aq) 1.895e-27 1.404e-22 1.0000 -26.7223

CN- 9.872e-28 2.501e-23 0.6473 -27.1945

Fe(CH3COO)2(aq) 9.290e-28 1.574e-22 1.0000 -27.0320

Acetone(aq) 5.313e-28 3.005e-23 1.0000 -27.2746

K(CH3COO)2- 5.002e-28 7.657e-23 0.6848 -27.4653

NH4(CH3COO)2- 4.544e-28 6.024e-23 0.6848 -27.5070

Ethylene(aq) 1.916e-28 5.236e-24 1.0000 -27.7175

Ethanamine(aq) 8.960e-29 3.934e-24 1.0000 -28.0477

Butanoate 7.577e-29 6.427e-24 0.6848 -28.2850

H-Succinate 3.950e-29 4.503e-24 0.6848 -28.5679

Na(But)(aq) 1.439e-29 1.543e-24 1.0000 -28.8419

Lactate 1.179e-29 1.023e-24 0.6848 -29.0930

Alanine(aq) 3.767e-30 3.269e-25 1.0000 -29.4240

Na(Lac)(aq) 2.395e-30 2.614e-25 1.0000 -29.6207

Mg(Lac)+ 8.213e-31 9.068e-26 0.6848 -30.2499

Ca(Lac)+ 7.947e-31 9.995e-26 0.6848 -30.2642

Mg(But)+ 7.643e-31 8.293e-26 0.6848 -30.2811

Ca(But)+ 6.300e-31 7.802e-26 0.6848 -30.3651

Fe2(OH)2++++ 2.470e-31 3.505e-26 0.0034 -33.0803

K(But)(aq) 2.341e-31 2.877e-26 1.0000 -30.6307

Butanoic_acid(aq) 2.124e-31 1.823e-26 1.0000 -30.6728

1-Propanol(aq) 9.348e-32 5.471e-27 1.0000 -31.0293

Fe(SO4)2- 5.724e-32 1.382e-26 0.6848 -31.4067

K(Lac)(aq) 3.896e-32 4.863e-27 1.0000 -31.4094

Propanal(aq) 3.132e-32 1.772e-27 1.0000 -31.5041

Succinic_acid(aq) 2.775e-32 3.192e-27 1.0000 -31.5567

Fe(But)+ 2.054e-32 2.860e-27 0.6848 -31.8518

Fe(Lac)+ 1.033e-32 1.458e-27 0.6848 -32.1504

Lactic_acid(aq) 3.747e-33 3.287e-28 1.0000 -32.4264

Fe(Ala)+ 2.110e-33 2.958e-28 0.6848 -32.8401

Mg(Ala)+ 1.012e-33 1.108e-28 0.6848 -33.1593

n-Butane(aq) 6.284e-34 3.557e-29 1.0000 -33.2017

1-Propene(aq) 4.798e-34 1.966e-29 1.0000 -33.3190

Glutarate 2.070e-34 2.622e-29 0.1931 -34.3983

Ca(Ala)+ 1.664e-34 2.077e-29 0.6848 -33.9432

S2O4-- 4.902e-35 6.117e-30 0.2307 -34.9465

S4O6-- 1.651e-35 3.606e-30 0.1931 -35.4965

1-Propanamine(aq) 5.030e-36 2.895e-31 1.0000 -35.2985

H-Glutarate 9.698e-37 1.238e-31 0.6848 -36.1777

S2O5-- 6.528e-37 9.164e-32 0.1931 -36.8994

Pentanoate 4.660e-37 4.590e-32 0.6848 -36.4960

Na(Pent)(aq) 9.003e-38 1.088e-32 1.0000 -37.0456

2-Hydroxybutanoate 7.759e-38 7.790e-33 0.6848 -37.2746

a-Aminobutyric_acid(aq) 4.114e-38 4.131e-33 1.0000 -37.3857

Mg(Pent)+ 2.689e-39 3.285e-34 0.6848 -38.7348

Ca(Pent)+ 2.265e-39 3.115e-34 0.6848 -38.8093

K(Pent)(aq) 1.464e-39 2.000e-34 1.0000 -38.8343

Pentanoic_acid(aq) 1.422e-39 1.414e-34 1.0000 -38.8471

Glutaric_acid(aq) 9.233e-40 1.188e-34 1.0000 -39.0346

Aspartic_acid(aq) 5.890e-40 7.635e-35 1.0000 -39.2299

Ethylacetate(aq) 3.955e-40 3.393e-35 1.0000 -39.4029

Asparagine(aq) 1.953e-40 2.513e-35 1.0000 -39.7093

Fe(Pent)+ 1.144e-40 1.749e-35 0.6848 -40.1060

1-Butanol(aq) 9.774e-41 7.056e-36 1.0000 -40.0099

Serine(aq) 4.792e-41 4.905e-36 1.0000 -40.3195

Fe3(OH)4(5+) 2.418e-41 5.547e-36 0.0002 -44.3056

Na(Prop)2- 2.375e-41 3.913e-36 0.6848 -40.7887

2-Hydroxybutanoic(aq) 2.191e-41 2.221e-36 1.0000 -40.6593

S2O6-- 1.979e-41 3.087e-36 0.1931 -41.4177

Butanal(aq) 6.703e-42 4.707e-37 1.0000 -41.1737

n-Pentane(aq) 3.413e-42 2.398e-37 1.0000 -41.4669

Mg(Prop)2(aq) 3.104e-42 5.152e-37 1.0000 -41.5081

Ca(Prop)2(aq) 2.224e-42 4.033e-37 1.0000 -41.6530

1-Butene(aq) 1.554e-42 8.493e-38 1.0000 -41.8084

K(Prop)2- 3.686e-43 6.649e-38 0.6848 -42.5979

Fe(Prop)2(aq) 2.889e-43 5.684e-38 1.0000 -42.5392

Adipate 3.935e-44 5.523e-39 0.1931 -44.1193

1-Butanamine(aq) 1.630e-44 1.161e-39 1.0000 -43.7879

Hexanoate 2.342e-45 2.626e-40 0.6848 -44.7949

Benzene(aq) 8.412e-46 6.399e-41 1.0000 -45.0751

2-Hydroxypentanoate 7.527e-46 8.586e-41 0.6848 -45.2878

Ethyne(aq) 5.728e-46 1.452e-41 1.0000 -45.2420

Valine(aq) 3.548e-46 4.048e-41 1.0000 -45.4500

Glutamic_acid(aq) 3.018e-46 4.324e-41 1.0000 -45.5203

S3O6-- 2.014e-46 3.770e-41 0.1931 -46.4102

H-Adipate 1.813e-46 2.563e-41 0.6848 -45.9060

Ca(Glyc)2(aq) 3.801e-47 7.040e-42 1.0000 -46.4201

Mg(Gly)2(aq) 1.303e-47 2.188e-42 1.0000 -46.8851

Mg(Glyc)2(aq) 1.132e-47 1.923e-42 1.0000 -46.9460

1-Pentanol(aq) 9.741e-48 8.362e-43 1.0000 -47.0114

Hexanoic_acid(aq) 7.391e-48 8.361e-43 1.0000 -47.1313

Na(Glyc)2- 6.719e-48 1.133e-42 0.6848 -47.3371

Phenol(aq) 2.001e-48 1.834e-43 1.0000 -47.6987

Glutamine(aq) 1.143e-48 1.626e-43 1.0000 -47.9421

Fe(Glyc)2(aq) 8.980e-49 1.801e-43 1.0000 -48.0467

Diglycine(aq) 5.832e-49 7.504e-44 1.0000 -48.2342

Benzoate 3.674e-49 4.334e-44 0.7422 -48.5643

Fe(Gly)2(aq) 3.502e-49 6.955e-44 1.0000 -48.4557

Threonine(aq) 2.576e-49 2.988e-44 1.0000 -48.5891

Adipic_acid(aq) 2.044e-49 2.909e-44 1.0000 -48.6896

2-Hydroxypentanoic(aq) 1.281e-49 1.474e-44 1.0000 -48.8923

K(Glyc)2- 1.045e-49 1.924e-44 0.6848 -49.1455

1-Propyne(aq) 9.269e-50 3.617e-45 1.0000 -49.0330

Pentanal(aq) 7.077e-50 5.936e-45 1.0000 -49.1502

n-Hexane(aq) 1.331e-50 1.117e-45 1.0000 -49.8758

1-Pentene(aq) 7.551e-51 5.157e-46 1.0000 -50.1220

Diketopiperazine(aq) 4.489e-51 4.989e-46 1.0000 -50.3478

Pimelate 2.993e-51 4.611e-46 0.1931 -51.2380

Toluene(aq) 2.951e-51 2.648e-46 1.0000 -50.5300

Ca(Gly)2(aq) 5.024e-52 9.207e-47 1.0000 -51.2990

Benzoic_acid(aq) 2.751e-52 3.272e-47 1.0000 -51.5605

HClO(aq) 9.495e-53 4.851e-48 1.0000 -52.0225

ClO- 5.876e-53 2.944e-48 0.6848 -52.3954

S5O6-- 1.783e-53 4.450e-48 0.1931 -53.4632

Heptanoate 1.581e-53 1.989e-48 0.6848 -52.9654

H-Pimelate 1.427e-53 2.212e-48 0.6848 -53.0101

1-Pentanamine(aq) 9.927e-54 8.427e-49 1.0000 -53.0032

2-Hydroxyhexanoate 3.142e-54 4.013e-49 0.6848 -53.6672

p-Toluate 2.480e-54 3.264e-49 0.6848 -53.7700

m-Toluate 1.421e-54 1.870e-49 0.6848 -54.0119

Isoleucine(aq) 3.526e-55 4.505e-50 1.0000 -54.4527

Leucine(aq) 2.516e-55 3.214e-50 1.0000 -54.5993

o-Phthalate 1.202e-55 1.921e-50 0.1931 -55.6343

Alanylglycine(aq) 6.652e-56 9.468e-51 1.0000 -55.1770

Heptanoic_acid(aq) 5.383e-56 6.825e-51 1.0000 -55.2689

Na(o-Phthalate)- 4.494e-56 8.189e-51 0.6848 -55.5118

Pimelic_acid(aq) 1.904e-56 2.970e-51 1.0000 -55.7204

Ca(o-Phthalate)(aq) 1.566e-56 3.113e-51 1.0000 -55.8053

o-Toluate 1.466e-56 1.930e-51 0.6848 -55.9983

1-Hexanol(aq) 1.186e-56 1.180e-51 1.0000 -55.9260

p-Toluic_acid(aq) 2.526e-57 3.349e-52 1.0000 -56.5976

m-Toluic_acid(aq) 1.124e-57 1.490e-52 1.0000 -56.9494

2-Hydroxyhexanoic(aq) 7.496e-58 9.648e-53 1.0000 -57.1251

H(o-Phthalate)- 5.519e-58 8.875e-53 0.6848 -57.4226

Na(But)2- 5.475e-58 1.051e-52 0.6848 -57.4260

1-Butyne(aq) 4.580e-58 2.413e-53 1.0000 -57.3391

Hexanal(aq) 3.381e-58 3.297e-53 1.0000 -57.4710

HO2- 1.989e-58 6.394e-54 0.6848 -57.8657

n-Heptane(aq) 7.785e-59 7.597e-54 1.0000 -58.1087

1-Hexene(aq) 5.689e-59 4.663e-54 1.0000 -58.2449

Ca(Lac)2(aq) 5.043e-59 1.072e-53 1.0000 -58.2973

Mg(Lac)2(aq) 4.758e-59 9.380e-54 1.0000 -58.3226

Mg(But)2(aq) 3.588e-59 6.935e-54 1.0000 -58.4452

N3- 2.938e-59 1.202e-54 0.6848 -58.6964

Ca(But)2(aq) 2.888e-59 6.026e-54 1.0000 -58.5395

Na(Lac)2- 2.349e-59 4.601e-54 0.6848 -58.7935

K(But)2- 8.496e-60 1.765e-54 0.6848 -59.2352

Fe(But)2(aq) 7.483e-60 1.676e-54 1.0000 -59.1259

o-Toluic_acid(aq) 5.156e-60 6.837e-55 1.0000 -59.2877

Fe(Lac)2(aq) 2.433e-60 5.543e-55 1.0000 -59.6139

Suberate 7.844e-61 1.315e-55 0.1931 -60.8197

K(Lac)2- 3.651e-61 7.724e-56 0.6848 -60.6020

Octanoate 1.521e-61 2.122e-56 0.6848 -60.9822

HN3(aq) 6.418e-62 2.689e-57 1.0000 -61.1926

1-Hexanamine(aq) 5.709e-62 5.626e-57 1.0000 -61.2434

NO2- 5.072e-62 2.273e-57 0.6473 -61.4837

o-Phthalic_acid(aq) 2.143e-62 3.468e-57 1.0000 -61.6689

Fe(Ala)2(aq) 1.938e-62 4.380e-57 1.0000 -61.7126

2-Hydroxyheptanoate 1.838e-62 2.599e-57 0.6848 -61.9001

H-Suberate 3.554e-63 5.994e-58 0.6848 -62.6137

Octanoic_acid(aq) 5.224e-64 7.337e-59 1.0000 -63.2820

Mg(Ala)2(aq) 3.296e-65 6.435e-60 1.0000 -64.4820

1-Heptanol(aq) 6.103e-66 6.907e-61 1.0000 -65.2144

Suberic_acid(aq) 4.989e-66 8.463e-61 1.0000 -65.3020

2-Hydroxyheptanoic(aq) 4.384e-66 6.242e-61 1.0000 -65.3581

HNO2(aq) 3.472e-66 1.590e-61 1.0000 -65.4594

1-Pentyne(aq) 2.341e-66 1.553e-61 1.0000 -65.6307

Ca(Ala)2(aq) 1.363e-66 2.870e-61 1.0000 -65.8656

n-Octane(aq) 4.115e-67 4.577e-62 1.0000 -66.3857

1-Heptene(aq) 3.163e-67 3.024e-62 1.0000 -66.4999

Heptanal(aq) 2.167e-67 2.410e-62 1.0000 -66.6642

n-Propylbenzene(aq) 1.391e-67 1.628e-62 1.0000 -66.8566

HSO5- 5.562e-68 6.124e-63 0.6848 -67.4192

Nonanoate 9.680e-70 1.482e-64 0.6848 -69.1785

1-Heptanamine(aq) 3.339e-70 3.746e-65 1.0000 -69.4764

2-Hydroxyoctanoate 1.075e-70 1.667e-65 0.6848 -70.1331

Azelate 4.135e-71 7.498e-66 0.1931 -71.0978

Nonanoic_acid(aq) 2.255e-72 3.475e-67 1.0000 -71.6469

H-Azelate 1.842e-73 3.359e-68 0.6848 -72.8991

1-Octanol(aq) 5.923e-74 7.512e-69 1.0000 -73.2274

O2(aq) 3.108e-74 9.685e-70 1.0000 -73.5075

2-Hydroxyoctanoic(aq) 2.564e-74 4.001e-69 1.0000 -73.5911

Phenylalanine(aq) 2.536e-74 4.079e-69 1.0000 -73.5959

Na(Pent)2- 2.093e-74 4.591e-69 0.6848 -73.8436

1-Hexyne(aq) 9.604e-75 7.683e-70 1.0000 -74.0175

Octanal(aq) 5.503e-75 6.871e-70 1.0000 -74.2594

1-Octene(aq) 1.276e-75 1.395e-70 1.0000 -74.8941

Mg(Pent)2(aq) 4.865e-76 1.073e-70 1.0000 -75.3129

Ca(Pent)2(aq) 4.010e-76 9.463e-71 1.0000 -75.3969

K(Pent)2- 3.253e-76 7.646e-71 0.6848 -75.6521

Azelaic_acid(aq) 2.674e-76 4.902e-71 1.0000 -75.5728

Fe(Pent)2(aq) 2.324e-76 5.842e-71 1.0000 -75.6337

Decanoate 3.651e-78 6.089e-73 0.6848 -77.6020

1-Octanamine(aq) 1.953e-78 2.458e-73 1.0000 -77.7094

2-Hydroxynonanoate 6.503e-79 1.097e-73 0.6848 -78.3513

Sebacate 1.151e-79 2.244e-74 0.1931 -79.6532

Leucylglycine(aq) 1.424e-80 2.610e-75 1.0000 -79.8465

Decanoic_acid(aq) 1.319e-80 2.213e-75 1.0000 -79.8798

FeNO2++ 1.215e-80 1.205e-75 0.2121 -80.5888

Tyrosine(aq) 6.414e-82 1.132e-76 1.0000 -81.1929

H-Sebacate 5.485e-82 1.075e-76 0.6848 -81.4252

2-Hydroxynonanoic(aq) 1.551e-82 2.632e-77 1.0000 -81.8093

1-Heptyne(aq) 3.622e-83 3.392e-78 1.0000 -82.4411

Nonanal(aq) 2.457e-83 3.404e-78 1.0000 -82.6096

NO3- 1.535e-83 9.272e-79 0.6473 -83.0027

Sebacic_acid(aq) 8.377e-85 1.650e-79 1.0000 -84.0769

CaNO3+ 1.865e-85 1.854e-80 0.6848 -84.8937

S2O8-- 5.117e-86 9.574e-81 0.1931 -86.0052

Undecanoate 2.136e-86 3.854e-81 0.6848 -85.8349

2-Hydroxydecanoate 3.868e-87 7.053e-82 0.6848 -86.5770

Undecanoic_acid(aq) 7.846e-89 1.423e-83 1.0000 -88.1054

2-Hydroxydecanoic(aq) 9.226e-91 1.692e-85 1.0000 -90.0350

Decanal(aq) 3.636e-91 5.534e-86 1.0000 -90.4393

1-Octyne(aq) 1.851e-91 1.987e-86 1.0000 -90.7326

HNO3(aq) 3.152e-92 1.934e-87 1.0000 -91.5015

n-Hexylbenzene(aq) 2.474e-92 3.909e-87 1.0000 -91.6067

Dodecanoate 1.270e-94 2.466e-89 0.6848 -94.0605

Tryptophan(aq) 1.483e-95 2.949e-90 1.0000 -94.8289

Dodecanoic_acid(aq) 4.588e-97 8.951e-92 1.0000 -96.3383

ClO2- 1.020e-97 6.701e-93 0.6848 -97.1557

HClO2(aq) 6.573e-102 4.382e-97 1.0000 -101.1823

FeNO3++ 2.604e-104 2.989e-99 0.2121 -104.2578

2-Butanone(aq) 1.239e-106 2.609e-101 1.0000 -105.9071

ClO3- 1.299e-128 1.056e-123 0.6670 -128.0623

2-Pentanone(aq) 5.707e-132 1.436e-126 1.0000 -131.2436

2-Hexanone(aq) 2.321e-156 6.792e-151 1.0000 -155.6343

ClO4- 8.157e-164 7.900e-159 0.6670 -163.2644

Ethylbenzene(aq) 2.664e-177 8.262e-172 1.0000 -176.5745

2-Heptanone(aq) 4.643e-181 1.549e-175 1.0000 -180.3332

2-Octanone(aq) 9.292e-206 3.481e-200 1.0000 -205.0319

n-Butylbenzene(aq) 9.406e-226 3.689e-220 1.0000 -225.0266

n-Pentylbenzene(aq) 1.461e-250 6.328e-245 1.0000 -249.8353

n-Heptylbenzene(aq) 1.100e-300 5.663e-295 1.0000 -299.9588

n-Octylbenzene(aq) 0.000 0.000 1.0000 -300.0000

Mineral saturation states log Q/K log Q/K

-----------------------------------------------------------------------------------------------

Pyrite 7.9486s/sat Monticellite -8.6617

Talc 3.5091s/sat Melanterite -9.0533

Minnesotaite 2.7226s/sat Arcanite -9.0746

Dolomite-ord 1.5209s/sat Periclase -9.4760

Dolomite 1.5209s/sat Oxychloride-Mg -9.8816

Quartz 1.2682s/sat Natrosilite -10.3646

Troilite 1.1589s/sat Ferrite-Mg -10.5472

Tridymite 1.0967s/sat Glauberite -10.6423

Pyrrhotite 1.0598s/sat Portlandite -10.7664

Chalcedony 0.9970s/sat Carnallite -10.8043

Cristobalite(alpha) 0.7177s/sat Hydromagnesite -10.8293

Sepiolite 0.5625s/sat MgCl2:4H2O -10.9909

Coesite 0.4582s/sat Mg1.25SO4(OH)0.5:0.5H2O -11.0095

Cristobalite(beta) 0.2742s/sat Ferrite-Ca -11.0780

Calcite 0.1364s/sat Kainite -11.3039

Aragonite -0.0080 Na2SiO3 -11.7416

SiO2(am) -0.0175 MgOHCl -11.7910

Dolomite-dis -0.0235 Mg1.5SO4(OH) -12.0381

Ice -0.1451 Syngenite -12.0554

Tremolite -0.2044 Fe -13.0675

Magnesite -0.2443 K2CO3:1.5H2O -13.5047

Siderite -0.4068 MgSO4 -13.5876

C -0.4760 Bloedite -13.5950

Greenalite -0.5112 NaFeO2 -13.9500

Monohydrocalcite -0.7037 FeSO4 -14.0141

Ferrosilite -0.9669 Mercallite -14.2865

Antigorite -0.9988 Trona-K -14.9161

Chrysotile -1.0222 Picromerite -15.1836

Goethite -1.2134 Akermanite -15.3314

Hematite -1.4601 Lawrencite -15.3499

Cronstedtite-7A -1.9331 Hydrophilite -15.4631

Huntite -2.1681 Leonite -15.4982

Enstatite -2.1986 Hillebrandite -15.9671

Magnetite -2.6126 Aphthitalite -16.0942

Halite -2.7032 Dicalcium_silicate -16.3132

Diopside -2.7719 MgCl2:2H2O -16.3964

Lansfordite -2.8235 Na4Ca(SO4)3:2H2O -17.5679

Nesquehonite -2.9653 Larnite -17.6072

Nahcolite -3.0858 Ca2Cl2(OH)2:H2O -18.1791

Fayalite -3.4199 MgCl2:H2O -19.7324

S -3.5265 Na3H(SO4)2 -20.4035

Sylvite -3.7325 KMgCl3:2H2O -20.4822

Okenite -4.0613 Burkeite -20.7407

Hedenbergite -4.0617 Lime -20.7809

Gypsum -4.3042 Tobermorite-14A -21.3219

FeO -4.3206 Rankinite -21.9844

Brucite -4.4450 Polyhalite -22.8327

Anhydrite -4.4673 K3H(SO4)2 -22.9775

Wollastonite -4.6964 Tobermorite-11A -23.0576

Fe(OH)2 -4.6996 Chloromagnesite -25.4677

Wustite -4.7363 Tobermorite-9A -26.5094

Pseudowollastonite -4.9356 Merwinite -26.7312

Bassanite -5.1154 Foshagite -26.9430

Kalicinite -5.2502 KMgCl3 -27.7557

CaSO4:0.5H2O(beta) -5.2835 Tachyhydrite -28.1065

Anthophyllite -5.6359 Jarosite -28.9668

Artinite -5.7729 Afwillite -30.1409

Gaylussite -5.7897 Jarosite-Na -31.1203

Pirssonite -5.9295 Ferrite-Dicalcium -34.5942

Natron -6.2528 Ca4Cl2(OH)6:13H2O -36.7162

Mirabilite -6.2616 Molysite -37.4274

Fe(OH)3 -6.3409 Xonotlite -37.4483

Na2CO3:7H2O -6.5693 Hatrurite -40.7511

Epsomite -6.7918 Na -42.3879

Forsterite -6.8749 Na4SiO4 -46.9135

Hexahydrite -7.0210 K -47.7625

Thenardite -7.0285 K8H4(CO3)6:3H2O -47.8285

Pentahydrite -7.3542 Na2O -54.1956

Andradite -7.4943 o-Phthalic_acid -60.2514

Gyrolite -7.5287 Fe2(SO4)3 -66.2640

Thermonatrite -7.5475 Na6Si2O7 -67.3883

Starkeyite -7.7351 Mg -73.9234

Na2CO3 -7.7610 K2O -74.3471

Antarcticite -7.8030 Si -78.1294

Bischofite -8.0379 Niter -85.1430

Kieserite -8.4489 Ca -91.2975

KNaCO3:6H2O -8.6453 Misenite -94.1519

partial

Gases press. (bar) fugacity fug. coef. log fug.

-----------------------------------------------------------------------------------------

N2(g) 0.06675 0.06673 0.9998 -1.1756

H2O(g) 0.02693 0.02560 0.9507 -1.5918

CO2(g) 0.01013 0.01008 0.9950 -1.9965

H2S(g) 0.0001265 0.0001255 0.9924 -3.9012

CH4(g) 7.980e-05 7.966e-05 0.9982 -4.0988

H2(g) 5.565e-07 5.569e-07 1.001 -6.2542

NH3(g) 8.257e-08 8.185e-08 0.9913 -7.0870

CO(g) 1.779e-12 1.779e-12 1.000* -11.7497

HCl(g) 9.078e-15 9.078e-15 1.000* -14.0420

S2(g) 1.133e-21 1.133e-21 1.000* -20.9456

SO2(g) 2.903e-22 2.858e-22 0.9845 -21.5439

C2H4(g) 4.037e-26 4.037e-26 1.000* -25.3939

NO(g) 8.804e-52 8.804e-52 1.000* -51.0553

Cl2(g) 6.014e-56 6.014e-56 1.000* -55.2208

Na(g) 1.344e-56 1.344e-56 1.000* -55.8715

K(g) 4.386e-59 4.386e-59 1.000* -58.3579

O2(g) 2.461e-71 2.459e-71 0.9993 -70.6092

NO2(g) 6.513e-81 6.513e-81 1.000* -80.1862

Mg(g) 2.311e-94 2.311e-94 1.000* -93.6363

Ca(g) 2.959e-117 2.959e-117 1.000* -116.5288

C(g) 8.417e-119 8.417e-119 1.000* -118.0748

Si(g) 6.692e-150 6.692e-150 1.000* -149.1744

*no data, gas taken to be ideal

In fluid Sorbed

Original basis total moles moles mg/kg moles mg/kg

-------------------------------------------------------------------------------------------------

H2O 55.51 55.51 9.739e+05

Ca++ 0.01000 0.01000 390.3

Cl- 0.4594 0.4594 1.586e+04

Fe++ 4.000e-05 4.000e-05 2.176

H+ 0.001239 0.001239 1.216

HCO3- 0.005000 0.005000 297.1

K+ 0.007000 0.007000 266.5

Mg++ 0.01000 0.01000 236.7

NH3(aq) 0.001000 0.001000 16.59

Na+ 0.4000 0.4000 8956.

O2(aq) -2.340e-05 -2.340e-05 -0.7291

SO4-- 5.000e-05 5.000e-05 4.678

SiO2(aq) 0.001900 0.001900 111.2

In fluid Sorbed

Elemental composition total moles moles mg/kg moles mg/kg

-------------------------------------------------------------------------------------------------

Calcium 0.01000 0.01000 390.3

Carbon 0.005000 0.005000 58.49

Chlorine 0.4594 0.4594 1.586e+04

Hydrogen 111.0 111.0 1.090e+05

Iron 4.000e-05 4.000e-05 2.176

Magnesium 0.01000 0.01000 236.7

Nitrogen 0.001000 0.001000 13.64

Oxygen 55.53 55.53 8.652e+05

Potassium 0.007000 0.007000 266.5

Silicon 0.001900 0.001900 51.97

Sodium 0.4000 0.4000 8956.

Sulfur 5.000e-05 5.000e-05 1.561

For thermodynamic data we have used the ‘thermo.com.V8.R6+.tdat’ database, an expanded variant of the LLNL ‘thermo.tdat’ database from the GWB library.

**Appendix-III: Mixing Model**

In this present study, the notion of bio-influenced greenalite (Gre) and carbonate mineral formation entails the production of CO2 from decaying organic carbon mass, which is isotopically lighter than the oceanic inorganic dissolved CO2 sink. Hence, the carbonate biproducts associated with greenalite authigenesis should incorporate the isotopically lighter CO2, and consequently should incorporate an intermediate dissolved CO2 species, heavier than the microbial OM (organic matter) preserved in the assemblage and lighter than the average Archean ocean signature of Dissolved Inorganic Carbonate (DIC) (+1.5±1.5‰, VPDB; 1). This contention explains the light δ13CInorganic values (-5.87±0.33‰) obtained from the studied Gre-bearing microbands. But, in Archean oceanic crusts, the lighter δ13CCalcite values ranging from −2 to −7‰ can be explained by the temperature dependency of the isotope fractionation between calcite (Cal) and CO2 in a fluid of seawater origin (c. −2 to +2‰, i.e., 0±2‰; 2), and/or by the input of mantle-derived, hydrothermal CO2 (c. −5‰; 3 or c. −4±2‰; 1). The decrease of up to −5 to −7‰ from the average Archean seawater value can be seen with increasing depth below seafloor 2,4. On the other hand, under modern seafloor setting, hydrothermal fluids with 13C-depleted CO2 (<−5‰ and even ≤−10‰) are also found in the hydrothermal field, explained through the mixing of hydrothermal fluids (HF) and decomposed (oxidised) sedimentary organic matter 5.

Therefore, a mixing model is necessary to differentiate whether the lighter values of bulk inorganic carbonate are the result of OM decomposition in pore waters or reflect mantle-derived, hydrothermal mixing with sea water.

First, we assume a contribution from the oxidised OM and addition of isotopically lighter CO2 to the dissolved CO2 pool of the average sea water. Here, X is the contribution from OM-converted pore water CO2 and (100-X) is the contribution from a sea water (SW) CO2(aq) sink, within the 100% CO2(aq) needed for HCO3- saturation and calcite precipitation [X= 0 to 99%]. Figure SF-4a describes this mixing scenario for the studied phase assemblage, taking δ13CSW = 0‰ and δ13COM = −26.91‰. The mixing curve shows 20-23% (21.83% for the average) contribution of OM-derived CO2 to produce the δ13CInorganic values of the studied carbonate assemblage.

Assuming that Y is the contribution from mantle-derived, hydrothermal (HF) CO2 and (100-Y) is the contribution from sea water (SW), within the 100% CO2 (aq) needed for HCO3- saturation and calcite precipitation [Y= 0 to 99%], Figure SF-4b shows the mixing model between sea water and hydrothermal-derived CO2(aq). The model indicates that 90-100% (97.92% for the average) contribution of mantle-derived, hydrothermal (HF) CO2 would be needed to modify the sea water CO2(aq) signature for obtaining the δ13CInorganic values of the studied carbonate assemblage. Hence, an entire hydrothermal fluid, almost in absent of average sea water, would be needed to produce the obtained lighter C-isotopic values for bulk carbonate phases.

Presently obtained δ13CInorganic values, ranging from −5.4 to −6.3‰, do not relate to a significant difference in depositional stratigraphy and original bathymetry. Also, they are associated with highly negative (−26.91±4.48‰) organic C, present in kerogenous OM preserved within the Gre-bearing microbands. The presence of authigenic textures and the preservation of shrinkage cracks, formed due to water expulsion during meta-depositional compaction under sediment overburden indicates significant interaction between sea water and pore water, along with the precipitation of authigenic mineral phases. This scenario does not support a precipitation from an entirely hydrothermal fluid mass, derived from mantle-associated deep-sea vents. While keeping into account for the textures that support Gre-precipitation and iron-silicate sedimentation, the scenario of entirely hydrothermal sourcing of CO2(aq) is not feasible to modify the sea water δ13CInorganic values to 5-6‰, i.e. just below the signature of average Archean sea water CO2(aq) 1. Rather, a more negative CO2(aq) pool (<−15‰), derived from OM decomposition during dissimilatory microbial iron reduction 6,7, should equilibrate with a sea water CO2(aq) pool to shift the resultant δ13CInorganic values to < −5 to −6‰ 8.

**References**

1. Veizer, J., Hoefs, J., Lowe, D. R. & Thurston, P. C. Geochemistry of Precambrian carbonates: II. Archean greenstone belts and Archean sea water. *Geochim Cosmochim Acta* 53, 859–871 (1989).

2. Shibuya, T. *et al.* Decrease of seawater CO2 concentration in the Late Archean: An implication from 2.6Ga seafloor hydrothermal alteration. *Precambrian Res* 236, 59–64 (2013).

3. Shirey, S. B. *et al.* Diamond genesis, seismic structure, and evolution of the Kaapvaal-Zimbabwe craton. *Science (1979)* 297, 1683–1686 (2002).

4. Alt, J. C., Muehlenbachs, K. & Honnorez, J. An oxygen isotopic profile through the upper kilometer of the oceanic crust, DSDP Hole 504B. *Earth Planet Sci Lett* 80, 217–229 (1986).

5. Cruse, A. M. & Seewald, J. S. Geochemistry of low-molecular weight hydrocarbons in hydrothermal fluids from Middle Valley, northern Juan de Fuca Ridge. *Geochim Cosmochim Acta* 70, 2073–2092 (2006).

6. Walker, J. C. G. Suboxic diagenesis in banded iron formations. *Nature* 309, 340–342 (1984).

7. Fischer, W. W. *et al.* Isotopic constraints on the Late Archean carbon cycle from the Transvaal Supergroup along the western margin of the Kaapvaal Craton, South Africa. *Precambrian Res* 169, 15–27 (2009).

8. Fischer, W. W. & Knoll, A. H. An iron shuttle for deepwater silica in Late Archean and early Paleoproterozoic iron formation. *GSA Bulletin* 121, 222–235 (2009).
