# Supplementary material for: Biological control on iron phyllosilicate authigenesis and Archean ocean chemistry
Source: Research Square preprint supplement (doi:10.21203/rs.3.rs-6098202/v1), 2025-04-01
Supplement: Supplementary file 2 [file b26d695f2aa78792acb95a79.xlsx]

## Sheet: OM-SW-CO2-Mixing-SF-4a
Sea Water CO2(aq) Proportion (100-X%)	OM-converted Pore Water CO2 Proportion (X%)	δ13CSW	δ13COM	Resultant mixed pore water δ13C	Sea water CO2(aq) (100-X) : OM-converted Pore water CO2(aq) (X)
0	100	0	-26.91	-26.91	0
1	99	0	-26.91	-26.6409	0.010101
2	98	0	-26.91	-26.3718	0.0204082
3	97	0	-26.91	-26.1027	0.0309278
4	96	0	-26.91	-25.8336	0.0416667
5	95	0	-26.91	-25.5645	0.0526316											For studied assemblage
6	94	0	-26.91	-25.2954	0.0638298													Organic Matter (OM)	Hydrothermal δ13CHF	Sea water δ13CSW
7	93	0	-26.91	-25.0263	0.0752688													δ13COrganic (‰; VPDB)	(‰; VPDB)	(‰; VPDB)
8	92	0	-26.91	-24.7572	0.0869565													-31.7537	-6	0
9	91	0	-26.91	-24.4881	0.0989011													-20.5741
10	90	0	-26.91	-24.219	0.111111													-20.2711
11	89	0	-26.91	-23.9499	0.123596													-19.9109
12	88	0	-26.91	-23.6808	0.136364												Bulk inorganic carbonate	-28.7554
13	87	0	-26.91	-23.4117	0.149425												δ13CInorganic (‰, VPDB)	-28.2686
14	86	0	-26.91	-23.1426	0.162791												-5.4	-31.0646
15	85	0	-26.91	-22.8735	0.176471												-6.1	-30.5964
16	84	0	-26.91	-22.6044	0.190476												-6.25	-30.9347
17	83	0	-26.91	-22.3353	0.204819												-5.8	-25.5131
18	82	0	-26.91	-22.0662	0.219512												-6.1	-25.5131
19	81	0	-26.91	-21.7971	0.234568												-5.6	-29.7337
20	80	0	-26.91	-21.528	0.25											Avg	-5.875	-26.9074
21	79	0	-26.91	-21.2589	0.265823											St. Dv.	0.331285	4.4807
22	78	0	-26.91	-20.9898	0.282051
23	77	0	-26.91	-20.7207	0.298701
24	76	0	-26.91	-20.4516	0.315789												Bulk inorganic carbonate	OM-Contribution	Sea water sink	Sea water CO2(aq) : OM-converted Pore water CO2(aq)
25	75	0	-26.91	-20.1825	0.333333												δ13CInorganic (‰, VPDB)	X= 100*δ13CInorganic / (-26.91)	100-X	100-X : X
26	74	0	-26.91	-19.9134	0.351351												-5.4	20.0669	79.9331	3.98333
27	73	0	-26.91	-19.6443	0.369863												-6.1	22.6682	77.3318	3.41148
28	72	0	-26.91	-19.3752	0.388889												-6.25	23.2256	76.7744	3.3056
29	71	0	-26.91	-19.1061	0.408451												-5.8	21.5533	78.4467	3.63966
30	70	0	-26.91	-18.837	0.428571												-6.1	22.6682	77.3318	3.41148
31	69	0	-26.91	-18.5679	0.449275												-5.6	20.8101	79.1899	3.80536
32	68	0	-26.91	-18.2988	0.470588												-5.875	21.832	78.168	3.58043
33	67	0	-26.91	-18.0297	0.492537
34	66	0	-26.91	-17.7606	0.515152
35	65	0	-26.91	-17.4915	0.538462
36	64	0	-26.91	-17.2224	0.5625
37	63	0	-26.91	-16.9533	0.587302
38	62	0	-26.91	-16.6842	0.612903
39	61	0	-26.91	-16.4151	0.639344
40	60	0	-26.91	-16.146	0.666667
41	59	0	-26.91	-15.8769	0.694915
42	58	0	-26.91	-15.6078	0.724138
43	57	0	-26.91	-15.3387	0.754386
44	56	0	-26.91	-15.0696	0.785714
45	55	0	-26.91	-14.8005	0.818182
46	54	0	-26.91	-14.5314	0.851852
47	53	0	-26.91	-14.2623	0.886792
48	52	0	-26.91	-13.9932	0.923077
49	51	0	-26.91	-13.7241	0.960784
50	50	0	-26.91	-13.455	1
51	49	0	-26.91	-13.1859	1.04082
52	48	0	-26.91	-12.9168	1.08333
53	47	0	-26.91	-12.6477	1.12766
54	46	0	-26.91	-12.3786	1.17391
55	45	0	-26.91	-12.1095	1.22222
56	44	0	-26.91	-11.8404	1.27273
57	43	0	-26.91	-11.5713	1.32558
58	42	0	-26.91	-11.3022	1.38095
59	41	0	-26.91	-11.0331	1.43902
60	40	0	-26.91	-10.764	1.5
61	39	0	-26.91	-10.4949	1.5641
62	38	0	-26.91	-10.2258	1.63158
63	37	0	-26.91	-9.9567	1.7027
64	36	0	-26.91	-9.6876	1.77778
65	35	0	-26.91	-9.4185	1.85714
66	34	0	-26.91	-9.1494	1.94118
67	33	0	-26.91	-8.8803	2.0303
68	32	0	-26.91	-8.6112	2.125
69	31	0	-26.91	-8.3421	2.22581
70	30	0	-26.91	-8.073	2.33333
71	29	0	-26.91	-7.8039	2.44828
72	28	0	-26.91	-7.5348	2.57143
73	27	0	-26.91	-7.2657	2.7037
74	26	0	-26.91	-6.9966	2.84615
75	25	0	-26.91	-6.7275	3
76	24	0	-26.91	-6.4584	3.16667
77	23	0	-26.91	-6.1893	3.34783
78	22	0	-26.91	-5.9202	3.54545
79	21	0	-26.91	-5.6511	3.7619
80	20	0	-26.91	-5.382	4
81	19	0	-26.91	-5.1129	4.26316
82	18	0	-26.91	-4.8438	4.55556
83	17	0	-26.91	-4.5747	4.88235
84	16	0	-26.91	-4.3056	5.25
85	15	0	-26.91	-4.0365	5.66667
86	14	0	-26.91	-3.7674	6.14286
87	13	0	-26.91	-3.4983	6.69231
88	12	0	-26.91	-3.2292	7.33333
89	11	0	-26.91	-2.9601	8.09091
90	10	0	-26.91	-2.691	9
91	9	0	-26.91	-2.4219	10.1111
92	8	0	-26.91	-2.1528	11.5
93	7	0	-26.91	-1.8837	13.2857
94	6	0	-26.91	-1.6146	15.6667
95	5	0	-26.91	-1.3455	19
96	4	0	-26.91	-1.0764	24
97	3	0	-26.91	-0.8073	32.3333
98	2	0	-26.91	-0.5382	49
99	1	0	-26.91	-0.2691	99
	Close to measured isotopic values

## Sheet: HF-SW-CO2-Mixing-SF-4b
Sea Water CO2(aq) Proportion (100-Y%)	Hydrothermal CO2(aq) Proportion (Y%)	δ13CSW	δ13CHF	Resultant mixed ambient water δ13C	Sea water CO2(aq) (100-Y) : Hydrothermal CO2(aq) (Y)
0	100	0	-6	-6	0
1	99	0	-6	-5.94	0.010101
2	98	0	-6	-5.88	0.0204082
3	97	0	-6	-5.82	0.0309278
4	96	0	-6	-5.76	0.0416667
5	95	0	-6	-5.7	0.0526316											For studied assemblage
6	94	0	-6	-5.64	0.0638298													Organic Matter (OM)	Hydrothermal δ13CHF	Sea water δ13CSW
7	93	0	-6	-5.58	0.0752688													δ13COrganic (‰; VPDB)	(‰; VPDB)	(‰; VPDB)
8	92	0	-6	-5.52	0.0869565													-31.7537	-6	0
9	91	0	-6	-5.46	0.0989011													-20.5741
10	90	0	-6	-5.4	0.111111													-20.2711
11	89	0	-6	-5.34	0.123596													-19.9109
12	88	0	-6	-5.28	0.136364												Bulk inorganic carbonate	-28.7554
13	87	0	-6	-5.22	0.149425												δ13CInorganic (‰, VPDB)	-28.2686
14	86	0	-6	-5.16	0.162791												-5.4	-31.0646
15	85	0	-6	-5.1	0.176471												-6.1	-30.5964
16	84	0	-6	-5.04	0.190476												-6.25	-30.9347
17	83	0	-6	-4.98	0.204819												-5.8	-25.5131
18	82	0	-6	-4.92	0.219512												-6.1	-25.5131
19	81	0	-6	-4.86	0.234568												-5.6	-29.7337
20	80	0	-6	-4.8	0.25											Avg	-5.875	-26.9074
21	79	0	-6	-4.74	0.265823											St. Dv.	0.331285	4.4807
22	78	0	-6	-4.68	0.282051
23	77	0	-6	-4.62	0.298701
24	76	0	-6	-4.56	0.315789												Bulk inorganic carbonate	Hydrothermal Contribution	Sea water sink	Sea water CO2(aq) : Hydrothermal CO2(aq)
25	75	0	-6	-4.5	0.333333												δ13CInorganic (‰, VPDB)	Y= 100*δ13CInorganic / (-6)	100-Y	100-Y : Y
26	74	0	-6	-4.44	0.351351												-5.4	90	10	0.111111
27	73	0	-6	-4.38	0.369863												-6.1	101.667	-1.66667	-0.0163934
28	72	0	-6	-4.32	0.388889												-6.25	104.167	-4.16667	-0.04
29	71	0	-6	-4.26	0.408451												-5.8	96.6667	3.33333	0.0344828
30	70	0	-6	-4.2	0.428571												-6.1	101.667	-1.66667	-0.0163934
31	69	0	-6	-4.14	0.449275												-5.6	93.3333	6.66667	0.0714286
32	68	0	-6	-4.08	0.470588												-5.875	97.9167	2.08333	0.0212766
33	67	0	-6	-4.02	0.492537
34	66	0	-6	-3.96	0.515152
35	65	0	-6	-3.9	0.538462
36	64	0	-6	-3.84	0.5625
37	63	0	-6	-3.78	0.587302
38	62	0	-6	-3.72	0.612903
39	61	0	-6	-3.66	0.639344
40	60	0	-6	-3.6	0.666667
41	59	0	-6	-3.54	0.694915
42	58	0	-6	-3.48	0.724138
43	57	0	-6	-3.42	0.754386
44	56	0	-6	-3.36	0.785714
45	55	0	-6	-3.3	0.818182
46	54	0	-6	-3.24	0.851852
47	53	0	-6	-3.18	0.886792
48	52	0	-6	-3.12	0.923077
49	51	0	-6	-3.06	0.960784
50	50	0	-6	-3	1
51	49	0	-6	-2.94	1.04082
52	48	0	-6	-2.88	1.08333
53	47	0	-6	-2.82	1.12766
54	46	0	-6	-2.76	1.17391
55	45	0	-6	-2.7	1.22222
56	44	0	-6	-2.64	1.27273
57	43	0	-6	-2.58	1.32558
58	42	0	-6	-2.52	1.38095
59	41	0	-6	-2.46	1.43902
60	40	0	-6	-2.4	1.5
61	39	0	-6	-2.34	1.5641
62	38	0	-6	-2.28	1.63158
63	37	0	-6	-2.22	1.7027
64	36	0	-6	-2.16	1.77778
65	35	0	-6	-2.1	1.85714
66	34	0	-6	-2.04	1.94118
67	33	0	-6	-1.98	2.0303
68	32	0	-6	-1.92	2.125
69	31	0	-6	-1.86	2.22581
70	30	0	-6	-1.8	2.33333
71	29	0	-6	-1.74	2.44828
72	28	0	-6	-1.68	2.57143
73	27	0	-6	-1.62	2.7037
74	26	0	-6	-1.56	2.84615
75	25	0	-6	-1.5	3
76	24	0	-6	-1.44	3.16667
77	23	0	-6	-1.38	3.34783
78	22	0	-6	-1.32	3.54545
79	21	0	-6	-1.26	3.7619
80	20	0	-6	-1.2	4
81	19	0	-6	-1.14	4.26316
82	18	0	-6	-1.08	4.55556
83	17	0	-6	-1.02	4.88235
84	16	0	-6	-0.96	5.25
85	15	0	-6	-0.9	5.66667
86	14	0	-6	-0.84	6.14286
87	13	0	-6	-0.78	6.69231
88	12	0	-6	-0.72	7.33333
89	11	0	-6	-0.66	8.09091
90	10	0	-6	-0.6	9
91	9	0	-6	-0.54	10.1111
92	8	0	-6	-0.48	11.5
93	7	0	-6	-0.42	13.2857
94	6	0	-6	-0.36	15.6667
95	5	0	-6	-0.3	19
96	4	0	-6	-0.24	24
97	3	0	-6	-0.18	32.3333
98	2	0	-6	-0.12	49
99	1	0	-6	-0.06	99
	Close to measured isotopic values
