# Supplementary material for: Biological control on iron phyllosilicate authigenesis and Archean ocean chemistry
Source: Research Square preprint supplement (doi:10.21203/rs.3.rs-6098202/v1), 2025-04-01
Supplement: Supplementary file 3 [file debbd30338fbf642b0335ca8.xlsx]

## Sheet: Microband dataset
Mother Specimens	Sample Names	Type of Microband/ Specimen	Position in mother specimen	Plot Median	Quartz	Goethite	Hematite	Greenalite	Mg-calcite	Calcite	Mg-Cal+Cal	Total	TOC (%)	Corrected d13C values (‰; VPDB)	Corrected d13C-Carb values (‰; VPDB)	Corrected d18O-Carb values (‰; VPDB)	Total Fe-containing Major Mineral Phases	Total Chert (Quartz) content	Type: Fe-rich (wt% of total Fe-mineral > 20%) Fe-poor (wt% of total Fe-mineral < 20%)
(Whole Rock Samples)	Microbands/Bulk	(Brief Microband Characteristics/Bulk Specimen)	(cm)	For Fig. 3e	(wt.%)	(wt.%)	(wt.%)	(wt.%)	(wt.%)	(wt.%)	(wt.%)	(wt.%)					(wt.%)	(wt.%)
KAG-2	KAG-2-L-1	Microband with laterally continuous microlaminae defined by Fe-containing minerals (primarily Hematite and Goethite) with minor Greenalite-bearing remnant lumps	0-0.4	0.2	43.6	1.7	54.7	0	0	0	0	100	0.258007	-31.0646	BDL	BDL	56.4	43.6	Fe-rich
	KAG-2-L-2	Chert-rich microband with discrete clusters of Fe-minerals (primarily Hematite and Goethite) along with minor Greenalite-bearing lumps	0.4-1.0	0.6	72.4	2.5	24.6	0.3	0.2	0	0.2	100	0.0191625	-27.885	BDL	BDL	27.4	72.4	Fe-rich
	KAG-2-L-3	Microband with microlaminae defined by Fe-containing minerals (primarily Hematite and Goethite) with minor Greenalite-bearing remnant lumps	1.0-1.4	1.2	66.7	1.3	31.6	0.1	0.3	0	0.3	100	0.131007	-29.7337	-5.4	-13.5	33	66.7	Fe-rich
	KAG-2-L-4	Microband with microlaminae defined by Fe-containing minerals	1.4-1.7	1.55	64	1	35	0	0	0	0	100	0.04211	-20.5741	BDL	BDL	36	64	Fe-rich
	KAG-2-L-5	Clear Chert- depleted of Fe-mineral defined continuous microlamina	1.7-2.0	1.85	82.4	0	17.6	0	0	0	0	100	0.0374869	-20.4105	BDL	BDL	17.6	82.4	Fe-poor
	KAG-2-L-6	Microband with microlamination defined by Fe-containing minerals within chert with minor Greenalite-bearing remnant lumps	2.0-2.2	2.1	64.9	0.7	33.9	0.3	0.2	0	0.2	100	0.111165	-28.7554	BDL	BDL	34.9	64.9	Fe-rich
	KAG-2-L-7	Clear Chert- depleted of Fe-mineral defined microlamina	2.2-2.6	2.4	88	0.3	11.7	0	0	0	0	100	0.0422403	-25.0013	BDL	BDL	12	88	Fe-poor
	KAG-2-L-8	Microband with microlamination defined by Fe-containing minerals within chert with minor Greenalite-bearing remnant lumps	2.6-3.0	2.8	76.1	0.8	22.3	0.6	0.2	0	0.2	100	0.138921	-28.2686	-6.1	-12.4	23.7	76.1	Fe-rich
	KAG-2-L-9'	Microlamina dominated by by Greenalite-bearing lumps	-	3.2	94.4	1.5	2.4	1.3	0.4	0	0.4	100	0.173284	-31.7537	-6.2	-13.3	5.2	94.4	Fe-poor (Gre-rich)
	KAG-2-L-9"	Microlamina containing discrete clusters of Greenalite-bearing lumps	-	3.6	94.1	1.9	2.5	0.7	0.5	0.3	0.8	100	0.0390633	-22.2324	-5.8	-12.7	5.1	94.1	Fe-poor (Gre-rich)
	KAG-2-L-10	Microband dominated by Fe-containing minerals with interstitial chert matrix and minor Greenalite-bearing remnant lumps	3.7-4.1	3.9	47.5	1.1	50.7	0.5	0.2	0	0.2	100	0.211687	-30.7845	-6.1	-12.8	52.3	47.5	Fe-rich
	KAG-2-L-11	Dusty Chert- depleted of Fe-mineral defined microlamina	4.1-4.6	4.35	90.1	0	9.9	0	0	0	0	100	0.0385958	-25.5131	BDL	BDL	9.9	90.1	Fe-poor
	KAG-2-L-12	Clear Chert- devoid of Fe-mineral defined microlamina	4.6-4.9	4.75	89.8	0	10.2	0	0	0	0	100	0.0292944	-26.0657	BDL	BDL	10.2	89.8	Fe-poor
	KAG-2-L-13	Chert-rich microband with discrete and discontinuous microlaminae defined by Fe-containing minerals	4.9-5.2	5.05	74.7	12.2	12.6	0.4	0.1	0	0.1	100	0.258926	-30.6108	-5.6	-12.6	25.2	74.7	Fe-rich
BF-5	BF-5 (Bulk)	Bulk specimen with alternate microbands of chert and Fe-mineral containing microlaminae along with Greenalite-bearing remanant clusters	NA	5.4	81.1	0	18.4	0.5	0	0	0	100	0.135201	-22.0761	BDL	BDL	18.9	81.1	Fe-poor (Gre-rich)
KRM-16	KRM-16-DL	Cherty, Fe-poor microband, but with distinct, laterally persistent microlaminae defined by Fe-containing minerals (primarily Hematite with very minor Fe-silicates) resembling microbial laminites	NA	5.6	91.3	0	8.7	0	0	0	0	100	0.205902	-30.8464	BDL	BDL	8.7	91.3	Fe-poor but with laterally persistent microlaminae defined by Fe-containing minerals (primarily Hematite with very minor Fe-silicates)
	KRM-16-L	Cherty, Fe-poor with crude discrete and discontinuous Fe-bearing laminations	NA	5.8	99.7	0	0.3	0	0	0	0	100	0.0343132	-23.1073	BDL	BDL	0.3	99.7	Fe-poor with crude discrete and discontinuous fe-bearing laminations
KAG-2	KAG-2-L-9	Microlamina defined by Greenalite lumps	3.0-3.7	3.4	94.9	0	5.1	0	0	0	0	100	0.0267156	-23.8011	BDL	BDL	5.1	94.9	Fe-poor
				Avg	77.6941	1.47059	20.4176	0.276471	0.123529	0.0176471	0.141176	100	0.112139	-26.7461	-5.86667	-12.8833	22.1647	77.6941
				StdV	16.286	2.87441	16.1722	0.361472	0.160193	0.0727607	0.212305	7.10543e-15	0.0846117	3.92942	0.320416	0.426224	16.3113	16.286

## Sheet: Sorted Microband Types
Fe-(or Gre)-rich specimens/ Fe-poor but containing microbial laminite defined by Fe-minerals	Gre %	Total calcite (Cal+Mg-Cal) %	TOC%	Total Fe-containing mineral modal %
KAG-2-L-1	0	0	0.258007	56.4
KAG-2-L-2	0.3	0.2	0.0191625	27.4
KAG-2-L-3	0.1	0.3	0.131007	33
KAG-2-L-4	0	0	0.04211	36
KAG-2-L-6	0.3	0.2	0.111165	34.9
KAG-2-L-8	0.6	0.2	0.138921	23.7
KAG-2-L-9'	1.3	0.4	0.173284	5.2
KAG-2-L-9"	0.7	0.8	0.0390633	5.1
KAG-2-L-10	0.5	0.2	0.211687	52.3
KAG-2-L-13	0.4	0.1	0.258926	25.2
BF-5 (Bulk)	0.5	0	0.135201	18.9
Avg.	0.427273	0.218182	0.138048	28.9182
StDev.	0.371728	0.231595	0.0834164	16.365
Fe-(and Gre)-poor specimens	Gre %	Total calcite (Cal+Mg-Cal) %	TOC%	Total Fe-containing mineral modal %
KAG-2-L-5	0	0	0.0374869	17.6
KAG-2-L-7	0	0	0.0422403	12
KAG-2-L-11	0	0	0.0385958	9.9
KAG-2-L-12	0	0	0.0292944	10.2
KRM-16-L	0	0	0.03	0.3
Avg.	0	0	0.0355235	10
StDev.	0	0	0.00565065	6.243
Fe-(and Gre)-poor laminated microband (but anomalously TOC%-rich microbial laminite)	Gre %	Total calcite (Cal+Mg-Cal) %	TOC%	Total Fe-containing mineral modal %
KRM-16-DL	0	0	0.21	8.7

## Sheet: Sheet4
Samples	Gre %	Total calcite (Cal+Mg-Cal) %	TOC%	Total Fe-containing mineral modal %					11 Samples out of 17 samples	Total calcite (Cal+Mg-Cal) %	TOC%
KAG-2-L-1	0	0	0.258007	56.4					KAG-2-L-1	0	0.258007
KAG-2-L-2	0.3	0.2	0.0191625	27.4					KAG-2-L-2	0.2	0.0191625
KAG-2-L-3	0.1	0.3	0.131007	33					KAG-2-L-3	0.3	0.131007
KAG-2-L-4	0	0	0.04211	36					KAG-2-L-6	0.2	0.111165
KAG-2-L-6	0.3	0.2	0.111165	34.9					KAG-2-L-8	0.2	0.138921
KAG-2-L-8	0.6	0.2	0.138921	23.7					KAG-2-L-9'	0.4	0.173284
KAG-2-L-9'	1.3	0.4	0.173284	5.2					KAG-2-L-9"	0.8	0.0390633
KAG-2-L-9"	0.7	0.8	0.0390633	5.1					KAG-2-L-10	0.2	0.211687
KAG-2-L-10	0.5	0.2	0.211687	52.3					KAG-2-L-13	0.1	0.258926
KAG-2-L-13	0.4	0.1	0.258926	25.2					BF-5 (Bulk)	0	0.135201
BF-5 (Bulk)	0.5	0	0.135201	18.9					KRM-16-DL	0	0.21
KAG-2-L-5	0	0	0.0374869	17.6
KAG-2-L-7	0	0	0.0422403	12
KAG-2-L-11	0	0	0.0385958	9.9
KAG-2-L-12	0	0	0.0292944	10.2
KRM-16-L	0	0	0.03	0.3
KRM-16-DL	0	0	0.21	8.7

## Sheet: Gre_Total-Carb
SUMMARY OUTPUT
Regression Statistics
Multiple R	0.673089
R Square	0.453049
Adjusted R Square	0.416585
Standard Error	0.162162
Observations	17
ANOVA
	df	SS	MS	F	Significance F
Regression	1	0.326728	0.326728	12.4247	0.00306313
Residual	15	0.394449	0.0262966
Total	16	0.721176
	Coefficients	Standard Error	t Stat	P-value	Lower 95%	Upper 95%	Lower 95.0%	Upper 95.0%
Intercept	0.0318796	0.050083	0.636534	0.534022	-0.0748699	0.138629	-0.0748699	0.138629
Gre %	0.395329	0.112154	3.52487	0.00306313	0.156278	0.63438	0.156278	0.63438
RESIDUAL OUTPUT					PROBABILITY OUTPUT
Observation	Predicted Total calcite (Cal+Mg-Cal) %	Residuals	Standard Residuals		Percentile	Total calcite (Cal+Mg-Cal) %
1	0.0318796	-0.0318796	-0.203038		2.94118	0
2	0.150478	0.0495217	0.315399		8.82353	0
3	0.0714125	0.228588	1.45585		14.7059	0
4	0.0318796	-0.0318796	-0.203038		20.5882	0
5	0.150478	0.0495217	0.315399		26.4706	0
6	0.269077	-0.0690771	-0.439946		32.3529	0
7	0.545808	-0.145808	-0.928635		38.2353	0
8	0.30861	0.49139	3.12962		44.1176	0
9	0.229544	-0.0295442	-0.188164		50	0
10	0.190011	-0.0900113	-0.573273		55.8824	0.1
11	0.229544	-0.229544	-1.46195		61.7647	0.2
12	0.0318796	-0.0318796	-0.203038		67.6471	0.2
13	0.0318796	-0.0318796	-0.203038		73.5294	0.2
14	0.0318796	-0.0318796	-0.203038		79.4118	0.2
15	0.0318796	-0.0318796	-0.203038		85.2941	0.3
16	0.0318796	-0.0318796	-0.203038		91.1765	0.4
17	0.0318796	-0.0318796	-0.203038		97.0588	0.8

## Sheet: Gre_TOC
SUMMARY OUTPUT
Regression Statistics
Multiple R	0.361979
R Square	0.131029
Adjusted R Square	0.0689597
Standard Error	0.0810533
Observations	16
ANOVA
	df	SS	MS	F	Significance F
Regression	1	0.0138686	0.0138686	2.11101	0.168288
Residual	14	0.091975	0.00656964
Total	15	0.105844
	Coefficients	Standard Error	t Stat	P-value	Lower 95%	Upper 95%	Lower 95.0%	Upper 95.0%
Intercept	0.0816053	0.0263197	3.10055	0.0078239	0.0251553	0.138055	0.0251553	0.138055
Gre %	0.0830779	0.0571795	1.45293	0.168288	-0.0395599	0.205716	-0.0395599	0.205716
RESIDUAL OUTPUT					PROBABILITY OUTPUT
Observation	Predicted TOC%	Residuals	Standard Residuals		Percentile	TOC%
1	0.0816053	0.176402	2.25276		3.125	0.0191625
2	0.106529	-0.0873662	-1.11572		9.375	0.0292944
3	0.0899131	0.0410937	0.524791		15.625	0.03
4	0.0816053	-0.0394953	-0.504378		21.875	0.0374869
5	0.106529	0.0046363	0.0592083		28.125	0.0385958
6	0.131452	0.007469	0.0953836		34.375	0.0390633
7	0.189607	-0.0163228	-0.208452		40.625	0.04211
8	0.13976	-0.100696	-1.28595		46.875	0.0422403
9	0.123144	0.0885424	1.13074		53.125	0.111165
10	0.114836	0.14409	1.84011		59.375	0.131007
11	0.123144	0.0120566	0.15397		65.625	0.135201
12	0.0816053	-0.0441183	-0.563417		71.875	0.138921
13	0.0816053	-0.039365	-0.502714		78.125	0.173284
14	0.0816053	-0.0430095	-0.549257		84.375	0.211687
15	0.0816053	-0.0523109	-0.668041		90.625	0.258007
16	0.0816053	-0.0516053	-0.65903		96.875	0.258926

## Sheet: TOC_Total-Fe-Mineral
SUMMARY OUTPUT
Regression Statistics
Multiple R	0.586967
R Square	0.34453
Adjusted R Square	0.297711
Standard Error	13.7945
Observations	16
ANOVA
	df	SS	MS	F	Significance F
Regression	1	1400.28	1400.28	7.35873	0.0168327
Residual	14	2664.03	190.288
Total	15	4064.31
	Coefficients	Standard Error	t Stat	P-value	Lower 95%	Upper 95%	Lower 95.0%	Upper 95.0%
Intercept	10.813	5.66542	1.9086	0.0770306	-1.33811	22.9641	-1.33811	22.9641
TOC%	115.02	42.4007	2.7127	0.0168327	24.0799	205.961	24.0799	205.961
RESIDUAL OUTPUT					PROBABILITY OUTPUT
Observation	Predicted Total Fe-containing mineral modal %	Residuals	Standard Residuals		Percentile	Total Fe-containing mineral modal %
1	40.4891	15.9109	1.19391		3.125	0.3
2	13.0171	14.3829	1.07925		9.375	5.1
3	25.8815	7.11854	0.534154		15.625	5.2
4	15.6565	20.3435	1.52652		21.875	9.9
5	23.5992	11.3008	0.847976		28.125	10.2
6	26.7918	-3.09176	-0.231996		34.375	12
7	30.7442	-25.5442	-1.91676		40.625	17.6
8	15.3061	-10.2061	-0.765835		46.875	18.9
9	35.1613	17.1387	1.28604		53.125	23.7
10	40.5948	-15.3948	-1.15518		59.375	25.2
11	26.3639	-7.46386	-0.560067		65.625	27.4
12	15.1248	2.47523	0.185734		71.875	33
13	15.6715	-3.67149	-0.275498		78.125	34.9
14	15.2523	-5.3523	-0.401621		84.375	36
15	14.1825	-3.98246	-0.298832		90.625	52.3
16	14.2636	-13.9636	-1.04779		96.875	56.4

## Sheet: TOC_Total-Carb
SUMMARY OUTPUT
Regression Statistics
Multiple R	0.576678
R Square	0.332557
Adjusted R Square	0.258397
Standard Error	0.199441
Observations	11
ANOVA
	df	SS	MS	F	Significance F
Regression	1	0.178372	0.178372	4.48431	0.063282
Residual	9	0.357992	0.0397769
Total	10	0.536364
	Coefficients	Standard Error	t Stat	P-value	Lower 95%	Upper 95%	Lower 95.0%	Upper 95.0%
Intercept	0.476164	0.135859	3.50483	0.00667266	0.168829	0.783499	0.168829	0.783499
TOC%	-1.68274	0.794636	-2.11762	0.063282	-3.48033	0.114856	-3.48033	0.114856
RESIDUAL OUTPUT					PROBABILITY OUTPUT
Observation	Predicted Total calcite (Cal+Mg-Cal) %	Residuals	Standard Residuals		Percentile	Total calcite (Cal+Mg-Cal) %
1	0.042006	-0.042006	-0.222011		4.54545	0
2	0.443919	-0.243919	-1.28916		13.6364	0
3	0.255714	0.0442858	0.23406		22.7273	0
4	0.289103	-0.0891028	-0.470928		31.8182	0.1
5	0.242397	-0.0423967	-0.224076		40.9091	0.2
6	0.184573	0.215427	1.13858		50	0.2
7	0.410431	0.389569	2.05896		59.0909	0.2
8	0.119951	0.0800486	0.423075		68.1818	0.2
9	0.0404598	0.0595402	0.314683		77.2727	0.3
10	0.248657	-0.248657	-1.31421		86.3636	0.4
11	0.12279	-0.12279	-0.648971		95.4545	0.8
