# Supplementary figures and images for: Biological control on iron phyllosilicate authigenesis and Archean ocean chemistry
Source: Research Square preprint supplement (doi:10.21203/rs.3.rs-6098202/v1), 2025-04-01

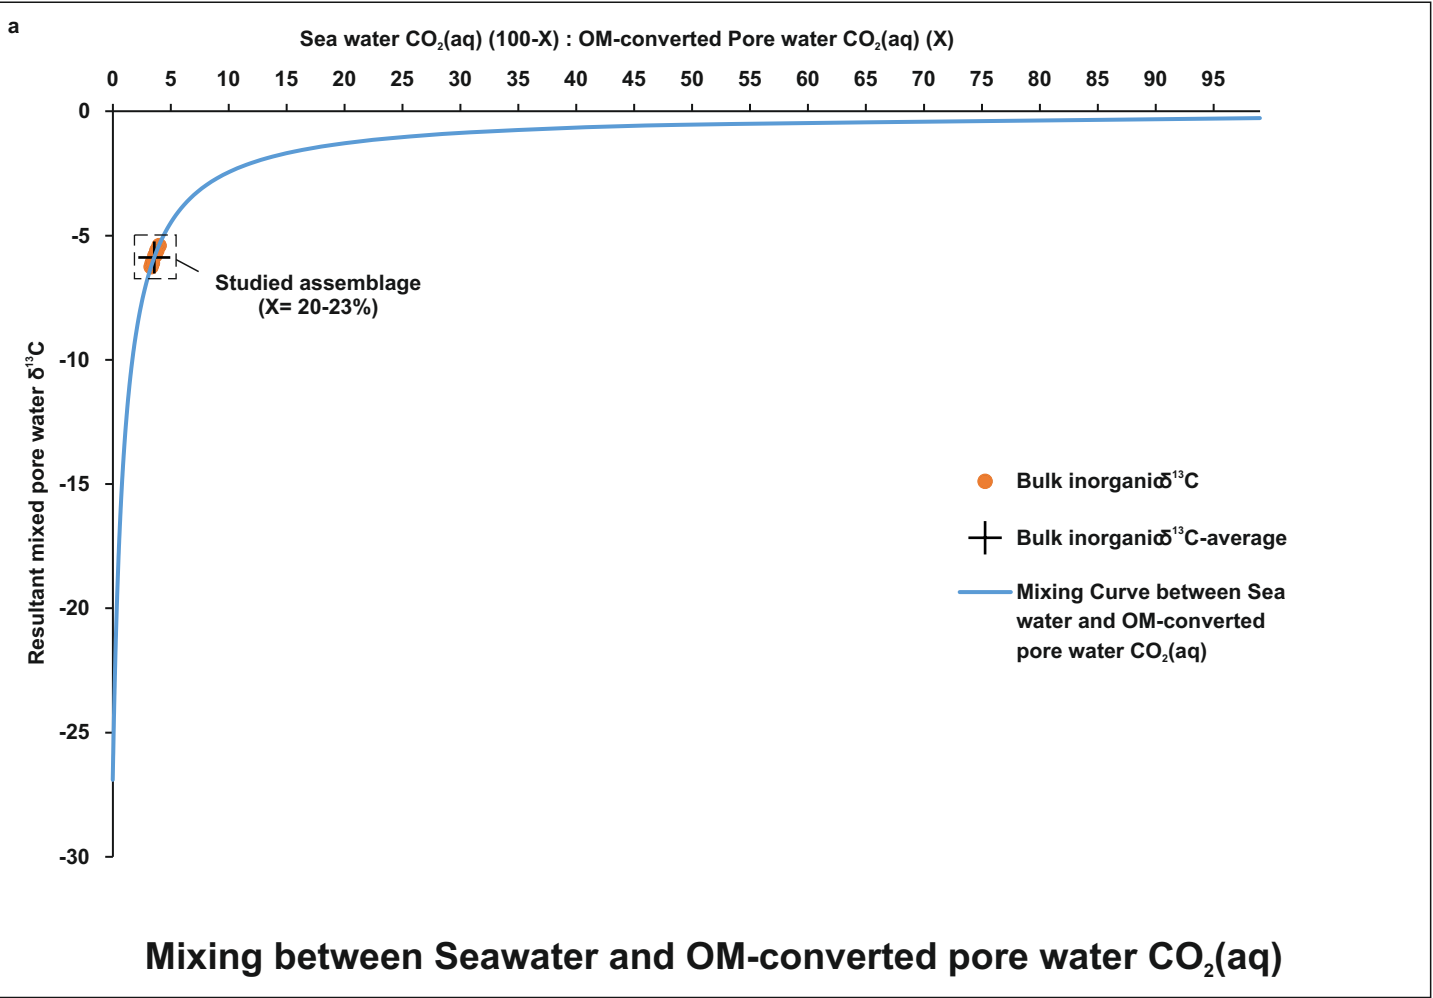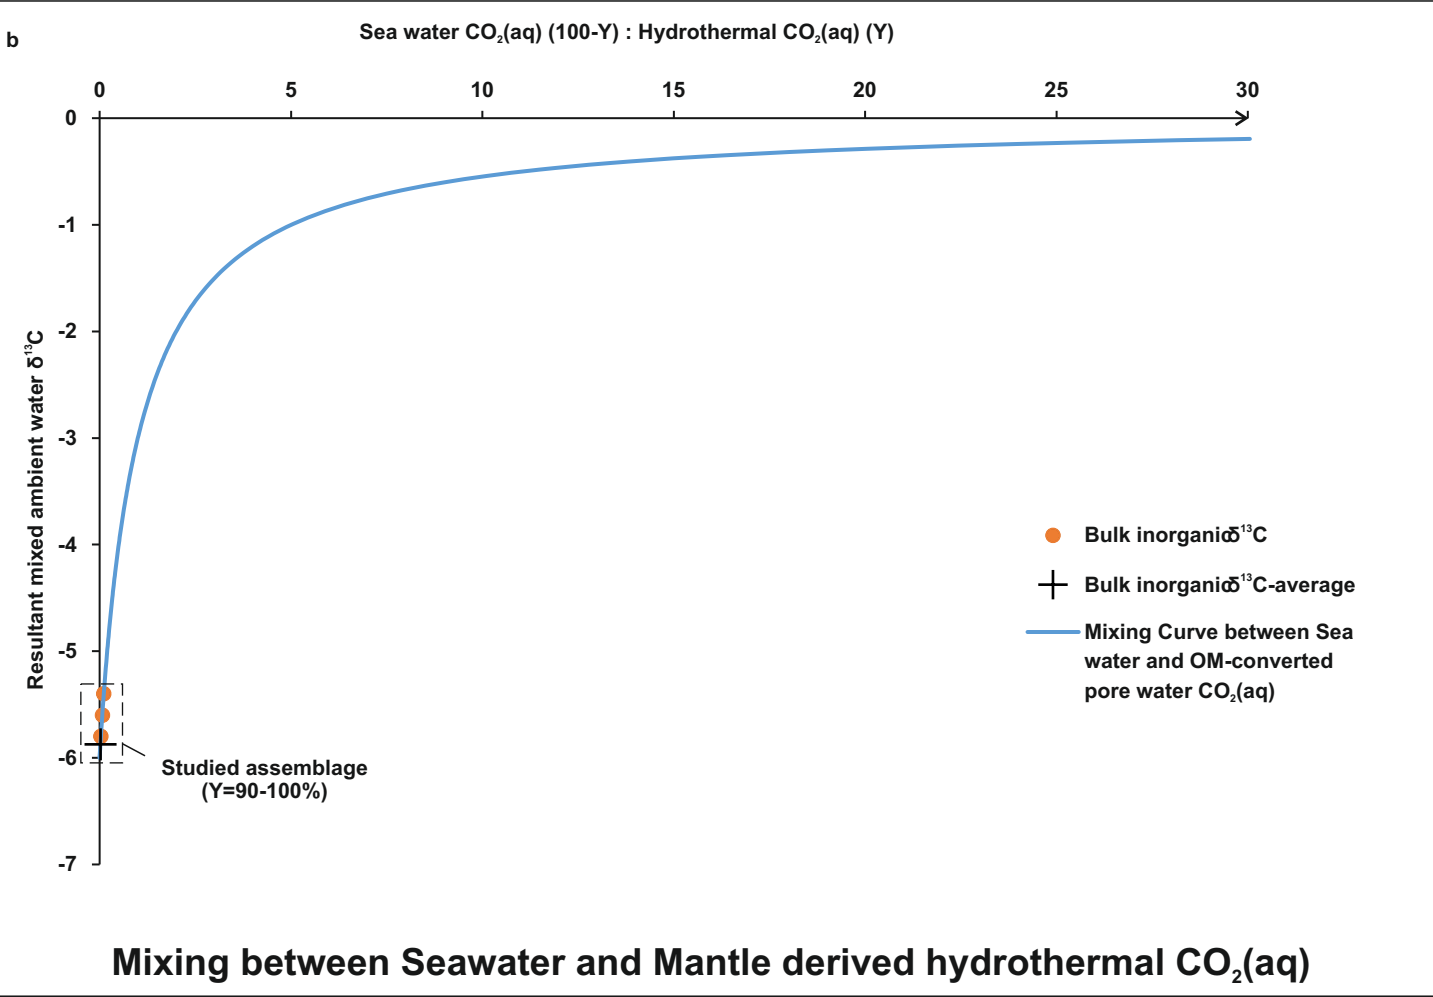

Supplement: Supplementary file 1 [file 04bde7375a0088fc081ae08f.pdf]
